# Supplementary material
Source: MDPI journal article supplement (https://www.mdpi.com/2072-4292/8/11/898)

# Supplementary Materials: Long-Term Post-Disturbance Forest Recovery in the Greater Yellowstone Ecosystem Analyzed Using Landsat Time Series Stack

Feng R. Zhao, Ran Meng, Chengquan Huang, Maosheng Zhao, Feng A. Zhao, Peng Gong, Le Yu and Zhiliang Zhu

**Table S1.** Number of validation points for post-fire forest recovery in the study region, stratified by forest species, burn severity, and recovery status.

|                   |               | Lodgepole Pine | Whitebark Pine  | Douglas Fir    | Engelmann Spruce/Subalpine Fir |
|-------------------|---------------|----------------|-----------------|----------------|--------------------------------|
| Low severity      | Recovered     | 50             | 0 <sup>a</sup>  | 50             | 7 <sup>b</sup>                 |
|                   | Non-recovered | 50             | 23 <sup>b</sup> | 50             | 0 <sup>a</sup>                 |
| Moderate severity | Recovered     | 50             | 2 <sup>b</sup>  | 6 <sup>b</sup> | 30                             |
|                   | Non-recovered | 50             | 50              | 50             | 50                             |
| High severity     | Recovered     | 50             | 50              | 50             | 50                             |
|                   | Non-recovered | 50             | 50              | 50             | 50                             |

<sup>a</sup> no available pixel; <sup>b</sup> including all available pixels.

**Table S2.** Number of sampling points and accuracy assessment for validating VCT post-fire and post-harvest recovery products for all forest species in the GYE. Map refers to the VCT predicted disturbance class.

| Post-Fire Recovery Validation    |                     |                                 |                                     |              |                    |
|----------------------------------|---------------------|---------------------------------|-------------------------------------|--------------|--------------------|
| Reference                        |                     |                                 |                                     |              |                    |
|                                  |                     | Recovered<br>(Tree Cover > 10%) | Non-Recovered<br>(Tree Cover ≤ 10%) | Row<br>Total | User's<br>Accuracy |
| Map                              | Recovered           | 249                             | 85                                  | 334          | 0.75               |
|                                  | Non-recovered       | 95                              | 445                                 | 540          | 0.82               |
|                                  | Column total        | 344                             | 530                                 | 874          |                    |
|                                  | Producer's Accuracy | 0.59                            | 0.90                                |              |                    |
|                                  | Overall Accuracy    |                                 | 0.80                                |              |                    |
| Post-Harvest Recovery Validation |                     |                                 |                                     |              |                    |
| Reference                        |                     |                                 |                                     |              |                    |
|                                  |                     | Recovered<br>(Tree Cover > 10%) | Non-Recovered<br>(Tree Cover ≤ 10%) | Row<br>Total | User's<br>Accuracy |
| Map                              | Recovered           | 97                              | 3                                   | 100          | 0.97               |
|                                  | Non-recovered       | 42                              | 58                                  | 100          | 0.58               |
|                                  | Column total        | 139                             | 61                                  | 200          |                    |
|                                  | Producer's Accuracy | 0.85                            | 0.89                                |              |                    |
|                                  | Overall Accuracy    |                                 | 0.86                                |              |                    |

**Table S3.** Number of sampling points and validation accuracy of the VCT post-fire forest regrowth product for the four major forest species in YNP. Map refer to VCT predicted recovery class for each forest type.

| <b>Lodgepole Pine (72% of Area)</b>                      |                     |                                     |                                      |                  |                            |
|----------------------------------------------------------|---------------------|-------------------------------------|--------------------------------------|------------------|----------------------------|
| <b>Reference</b>                                         |                     |                                     |                                      |                  |                            |
|                                                          |                     | <b>Recovered<br/>Cover &gt; 10%</b> | <b>Non-Recovered<br/>Cover ≤ 10%</b> | <b>Row Total</b> | <b>User's<br/>Accuracy</b> |
| Map                                                      | Recovered           | 138                                 | 9                                    | 147              | 0.94                       |
|                                                          | Non-recovered       | 36                                  | 131                                  | 167              | 0.78                       |
|                                                          | Column total        | 174                                 | 140                                  | 314              |                            |
|                                                          | Producer's Accuracy | 0.65                                | 0.97                                 |                  |                            |
|                                                          | Overall Accuracy    |                                     | 0.83                                 |                  |                            |
| <b>Whitebark Pine (15% of Area)</b>                      |                     |                                     |                                      |                  |                            |
| <b>Reference</b>                                         |                     |                                     |                                      |                  |                            |
|                                                          |                     | <b>Recovered<br/>Cover &gt; 10%</b> | <b>Non-Recovered<br/>Cover ≤ 10%</b> | <b>Row Total</b> | <b>User's<br/>Accuracy</b> |
| Map                                                      | Recovered           | 9                                   | 42                                   | 51               | 0.18                       |
|                                                          | Non-recovered       | 10                                  | 111                                  | 121              | 0.92                       |
|                                                          | Column total        | 19                                  | 153                                  | 172              |                            |
|                                                          | Producer's Accuracy | 0.11                                | 0.95                                 |                  |                            |
|                                                          | Overall Accuracy    |                                     | 0.88                                 |                  |                            |
| <b>Douglas-fir (7.1% of Area)</b>                        |                     |                                     |                                      |                  |                            |
| <b>Reference</b>                                         |                     |                                     |                                      |                  |                            |
|                                                          |                     | <b>Recovered Cover<br/>&gt; 10%</b> | <b>Non-Recovered<br/>Cover ≤ 10%</b> | <b>Row Total</b> | <b>User's<br/>Accuracy</b> |
| Map                                                      | Recovered           | 39                                  | 18                                   | 57               | 0.80                       |
|                                                          | Non-recovered       | 23                                  | 124                                  | 147              | 0.75                       |
|                                                          | Column total        | 62                                  | 142                                  | 204              |                            |
|                                                          | Producer's Accuracy | 0.47                                | 0.93                                 |                  |                            |
|                                                          | Overall Accuracy    |                                     | 0.76                                 |                  |                            |
| <b>Engelmann Spruce and Subalpine Fir (5.9% of Area)</b> |                     |                                     |                                      |                  |                            |
| <b>Reference</b>                                         |                     |                                     |                                      |                  |                            |
|                                                          |                     | <b>Recovered<br/>Cover &gt; 10%</b> | <b>Non-Recovered<br/>Cover ≤ 10%</b> | <b>Row Total</b> | <b>User's<br/>Accuracy</b> |
| Map                                                      | Recovered           | 63                                  | 16                                   | 79               | 0.68                       |
|                                                          | Non-recovered       | 26                                  | 79                                   | 105              | 0.84                       |
|                                                          | Column total        | 89                                  | 95                                   | 184              |                            |
|                                                          | Producer's Accuracy | 0.18                                | 0.98                                 |                  |                            |
|                                                          | Overall Accuracy    |                                     | 0.84                                 |                  |                            |

**Table S4.** Maximum IFI (Integrated Forest Index) values and minimum NDVI (Normalized Difference of Vegetation Index) values used to determine forest recovery in GYE.

| <b>Path-Row</b> | <b>Maximum IFI</b> | <b>Minimum NDVI</b> |
|-----------------|--------------------|---------------------|
| p037r029        | 12.649             | 0.231               |
| p037r030        | 9.759              | 0.206               |
| p038r028        | 6.823              | 0.271               |
| p038r029        | 7.00               | 0.357               |
| p038r030        | 3.909              | 0.327               |
| p038r031        | 4.967              | 0.205               |
| p039r028        | 6.218              | 0.119               |
| p039r029        | 6.218              | 0.119               |

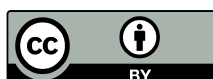

Supplement: s1 [file s1]
